# Supplementary material for: Association of Music Interventions With Health-Related Quality of Life: A Systematic Review and Meta-analysis
Source: PubMed Central journal article supplement (PMC8941357; doi:10.1001/jamanetworkopen.2022.3236), 2022-03-22

## Supplemental Online Content

McCrary JM, Altenmüller E, Kretschmer C, Scholz DS. Association of music interventions with health-related quality of life: a systematic review and meta-analysis. *JAMA Netw Open*. 2022;5(3):e223236. doi:10.1001/jamanetworkopen.2022.3236

**eTable 1.** Articles Excluded After Full-text Review, With Reasons

**eTable 2.** Reviews Searched for Additional Records in This Meta-analysis

**eTable 3.** GRADE Quality of Evidence Ratings for Included Studies

**eFigure 1.** PRISMA Flow Diagram

**eFigure 2.** Funnel Plot Detailing Distribution of MCS Pre-post Changes

**eFigure 3.** Funnel Plot Detailing Distribution of PCS Pre-post Changes

**eFigure 4.** Funnel Plot Detailing Distribution of MCS Changes in Music Plus TAU vs TAU Interventions

**eFigure 5.** Funnel Plot Detailing Distribution of PCS Changes in Music Plus TAU vs TAU Interventions

**eFigure 6.** Meta-analysis of Pre-post Changes in MCS Scores, Stratified by Music Plus TAU vs All Other Interventions

**eFigure 7.** Meta-analysis of Pre-post Changes in PCS Scores, Stratified by Music Plus TAU vs All Other Interventions

**eFigure 8.** Meta-analysis of MCS Scores in Music vs Meditation Interventions

**eFigure 9.** Meta-analysis of PCS Scores in Music vs Meditation Interventions

This supplemental material has been provided by the authors to give readers additional information about their work.

**eTable 1.** Articles excluded after full-text review, with reasons.

| Author                  | Year | Title                                                       | Journal                                                                                                                                                                             | Reason for Exclusion                                                                                    |
|-------------------------|------|-------------------------------------------------------------|-------------------------------------------------------------------------------------------------------------------------------------------------------------------------------------|---------------------------------------------------------------------------------------------------------|
| Akmese & Oran           | 2014 | Journal of Midwifery and Women's Health                     | Effects of Progressive Muscle Relaxation Exercises Accompanied by Music on Low Back Pain and Quality of Life During Pregnancy                                                       | Not a music-focused intervention                                                                        |
| Ashok & Soman           | 2018 | International Journal of Pharma and Bio Sciences            | Efficacy of music therapy on hospital induced anxiety and health related quality of life in coronary artery bypass graft patients: Study protocol for a randomized controlled trial | Study protocol for Ashok, Shanmugam & Soman 2019 (included)                                             |
| Bell, McIntyre & Hadley | 2016 | Psychomusicology: Music, Mind and Brain                     | Listening to classical music results in a positive correlation between spatial reasoning and mindfulness                                                                            | No use of SF-36/12                                                                                      |
| Bidabadi & Mehryar      | 2015 | Journal of Affective Disorders                              | Music therapy as an adjunct to standard treatment for obsessive compulsive disorder and co-morbid anxiety and depression: A randomized clinical trial                               | No use of SF-36/12                                                                                      |
| Bygren et al.           | 2009 | Psychosomatic Medicine                                      | Cultural participation and health: A randomized controlled trial among medical care staff                                                                                           | No compatible SF-36 data; SF-36 data only available as a composite of multiple interventions            |
| Cao et al.              | 2016 | International Journal of Clinical and Experimental Medicine | Music therapy improves pregnancy-induced hypertension treatment efficacy                                                                                                            | No pre and post-test SF-36 data                                                                         |
| Castelino et al.        | 2013 | Australasian Psychiatry                                     | The effect of group music therapy on anxiety, depression and quality of life in older adults with psychiatric disorders                                                             | No pre and post-test SF-36 data collection (data only at pre- and 4-weeks post-intervention completion) |
| Cohen et al.            | 2006 | The Gerontologist                                           | The Impact of Professionally Conducted Cultural Programs on the Physical Health, Mental Health, and Social Functioning of Older Adults                                              | No use of SF-36/12                                                                                      |
| Cooke et al.            | 2010 | Aging & Mental Health                                       | A randomized controlled trial exploring the effect of music on agitated behaviours and anxiety in older people with dementia                                                        | No use of SF-36/12                                                                                      |
| Erkkila et al.          | 2011 | British Journal of Psychiatry                               | Individual music therapy for depression: A randomised controlled trial                                                                                                              | No compatible SF-36 data available                                                                      |
| Erkkila et al.          | 2021 | Frontiers in Psychology                                     | Music Therapy for Depression Enhanced With Listening Homework and Slow Paced Breathing: A Randomised Controlled Trial                                                               | No compatible SF-36 data available                                                                      |
| Franco et al.           | 2014 | Psychology of Music                                         | Affect-matching music improves cognitive performance in adults and young children for both positive and negative emotions                                                           | No use of SF-36/12                                                                                      |
| Gold et al.             | 2013 | Psychotherapy & Psychosomatics                              | Individual music therapy for mental health care clients with low therapy motivation: Multicentre randomised controlled trial                                                        | No use of SF-36/12                                                                                      |
| Hattori et al.          | 2011 | Geriatrics & Gerontology International                      | Controlled study on the cognitive and psychological effect of coloring and drawing in mild Alzheimer's disease patients                                                             | Not a music-focused intervention                                                                        |
| Heiderscheit            | 2006 | Thesis                                                      | The effects of the Bonny Method of Guided Imagery and Music on interpersonal problems, sense of coherence and salivary immunoglobulin a of adults in chemical dependency treatment  | No use of SF-36/12                                                                                      |
| Henneghan & Becker      | 2019 | Archives of Physical Medicine and Rehabilitation            | Improving Cognitive and Psychosocial Symptoms and Social Functioning in Breast Cancer Survivors                                                                                     | No compatible SF-36 data available in conference abstract (social subscale reported only)               |

|                              |      |                                                            |                                                                                                                                                                                               |                                                                                           |
|------------------------------|------|------------------------------------------------------------|-----------------------------------------------------------------------------------------------------------------------------------------------------------------------------------------------|-------------------------------------------------------------------------------------------|
| Hofmann et al.               | 2010 | 17th International Congress on Sound & Vibration           | Additional effects of multisensory perception of music with a vibroacoustic mat to pure listening of music                                                                                    | No use of SF-36/12 (use of modified SF-12)                                                |
| Hseih et al.                 | 2019 | European Journal of Cancer Care                            | Effect of home-based music intervention versus ambient music on breast cancer survivors in the community: A feasibility study in Taiwan                                                       | No use of SF-36/12                                                                        |
| Innes et al.                 | 2018 | Journal of Alzheimer's Disease                             | Effects of meditation and music-listening on blood biomarkers of cellular aging and Alzheimer's disease in adults with subjective cognitive decline: An exploratory randomized clinical trial | Another report of study described in Innes et al. 2016 (included) with fewer participants |
| Innes et al.                 | 2016 | Complementary Therapies in Medicine                        | A randomized controlled trial of two simple mind-body programs, Kirtan Kriya meditation and music listening, for adults with subjective cognitive decline: Feasibility and acceptability      | Another report of study described in Innes et al. 2018 (included)                         |
| Jeon, Kim & Yoo              | 2009 | Journal of Korean Academy of Nursing                       | Effects of music therapy and rhythmic exercise on quality of life, blood pressure and upper extremity muscle strength in institution-dwelling elderly women                                   | No compatible SF-36 data available                                                        |
| Kim & Kang                   | 2021 | Geriatric Nursing                                          | Effect of a group music intervention on cognitive function and mental health outcomes among nursing home residents: A randomized controlled pilot study                                       | No use of SF-36/12                                                                        |
| Liddle, Parkinson & Sibbritt | 2012 | Australasian Journal on Ageing                             | Painting pictures and playing musical instruments: Change in participation and relationship to health in older women                                                                          | Not an intervention study                                                                 |
| Lin et al.                   | 2020 | Annals of Thoracic and Cardiovascular Surgery              | Effect of music therapy on the chronic pain and midterm quality of life of patients after mechanical valve replacement                                                                        | No pre and post-test SF-36 data                                                           |
| Lord et al.                  | 2010 | American Journal of Respiratory and Critical Care Medicine | Effect of singing lessons in patients with COPD - A randomised controlled trial                                                                                                               | Abstract version of Lord et al. 2012 (included)                                           |
| Lord et al.                  | 2012 | American Journal of Respiratory and Critical Care Medicine | Effects of "singing for breathing" TM in patients with chronic obstructive pulmonary disease (COPD)-a randomized control trial                                                                | Abstract version of Lord et al. 2012 (included)                                           |
| Lord et al.                  | 2011 | Journal of Aerosol Medicine and Pulmonary Drug Delivery    | Singing for breathing effects of singing lessons in patients with COPD - a randomised control trial                                                                                           | Another report of study described in Lord et al. 2012 (included)                          |
| Low et al.                   | 2020 | Journal of Alternative and Complementary Medicine          | Vocal music therapy for chronic pain: A mixed methods feasibility study                                                                                                                       | No use of SF-36/12                                                                        |
| Mandel et al.                | 2007 | Journal of Music Therapy                                   | Effects of music therapy on health-related outcomes in cardiac rehabilitation: A randomized controlled trial                                                                                  | No pre and post-test SF-36 data                                                           |
| Mandel, Davis & Secic        | 2014 | Hospital Topics                                            | Effects of music therapy on patient satisfaction and health-related quality of life of hospital inpatients                                                                                    | No pre and post-test SF-36 data                                                           |
| Mateu et al.                 | 2012 | Basic and Clinical Pharmacology and Toxicology             | Jacobson's progressive muscle relaxation as adjunctive therapy in osteoarticular chronic pain                                                                                                 | Abstract version of Mateu et al. 2018 (included)                                          |
| Novotna et al.               | 2017 | Multiple Sclerosis                                         | Effect of music therapy on common symptoms of multiple sclerosis                                                                                                                              | No compatible SF-36 data available in conference abstract                                 |
| Pearce et al.                | 2016 | Journal of Community & Applied Social Psychology           | Is group singing special? Health, well-being and social bonds in community-based adult education classes                                                                                      | No use of SF-36/12 (use of modified SF-36)                                                |
| Poćwierz-Marciniak & Bidzan  | 2017 | Health Psychology Report                                   | The influence of music therapy on quality of life after a stroke                                                                                                                              | No compatible SF-36 data available                                                        |

|                                                                                                                                                                                  |      |                                                   |                                                                                                                                                                                       |                                                                     |
|----------------------------------------------------------------------------------------------------------------------------------------------------------------------------------|------|---------------------------------------------------|---------------------------------------------------------------------------------------------------------------------------------------------------------------------------------------|---------------------------------------------------------------------|
| Puhan et al.                                                                                                                                                                     | 2006 | BMJ                                               | Didgeridoo playing as alternative treatment for obstructive sleep apnea syndrome: randomised controlled trial                                                                         | No pre and post-test SF-36 data                                     |
| Raglio et al.                                                                                                                                                                    | 2016 | International Journal of Neuroscience             | Improvement of spontaneous language in stroke patients with chronic aphasia treated with music therapy: A randomized controlled trial                                                 | No compatible SF-36 data available                                  |
| Reagon et al.                                                                                                                                                                    | 2017 | European Journal of Cancer Care                   | Choir singing and health status in people affected by cancer                                                                                                                          | Observational, not intervention study                               |
| Ross, Hollen & Fitzgerald                                                                                                                                                        | 2006 | American Journal of Kidney Disease                | Observational study of an Arts-in-Medicine Program in an outpatient hemodialysis unit                                                                                                 | Not a music-focused intervention                                    |
| Russ et al.                                                                                                                                                                      | 2020 | Journal of Alternative and Complementary Medicine | Cortisol as an acute stress biomarker in young hematopoietic cell transplant patients/caregivers: Active music engagement protocol                                                    | No use of SF-36/12                                                  |
| Shiranbidabadi & Mehryar                                                                                                                                                         | 2015 | Journal of Affective Disorders                    | Music therapy as an adjunct to standard treatment for obsessive compulsive disorder and co-morbid anxiety and depression: A randomized clinical trial                                 | No use of SF-36/12                                                  |
| Skingley et al.                                                                                                                                                                  | 2011 | BMC Public Health                                 | The effectiveness and cost-effectiveness of a participative community singing programme as a health promotion initiative for older people: protocol for a randomised controlled trial | Another report of study described in Coulton et al. 2015 (included) |
| Skingley et al.                                                                                                                                                                  | 2014 | Arts & Health                                     | Singing for breathing: Participants' perceptions of a group singing programme for people with COPD                                                                                    | Another report of study described in Coulton et al. 2015 (included) |
| Skingley, Marin & Clift                                                                                                                                                          | 2016 | Journal of Applied Gerontology                    | The contribution of community singing groups to the well-being of older people: Participant perspectives from the United Kingdom                                                      | Another report of study described in Coulton et al. 2015 (included) |
| Tai, Wang & Yang                                                                                                                                                                 | 2015 | Neuropsychiatric Disease and Treatment            | Effect of music intervention on the cognitive and depression status of senior apartment residents in Taiwan                                                                           | No use of SF-36/12                                                  |
| Unspecified<br>( <a href="https://trialssearch.who.int/Trial2.aspx?TrialID=ACTRN12616001671459">https://trialssearch.who.int/Trial2.aspx?TrialID=ACTRN12616001671459</a> )       | 2016 | ACTRN Clinical Trials Registry                    | Personalised relaxation practice to improve sleep quality in patients with chronic fatigue syndrome and depression: a Randomised Control Trial                                        | No study results available                                          |
| Unspecified<br>( <a href="https://trialssearch.who.int/Trial2.aspx?TrialID=ISRCTN50156343">https://trialssearch.who.int/Trial2.aspx?TrialID=ISRCTN50156343</a> )                 | 2012 | ISRCTN                                            | Music and expressive arts therapy for women with a history of gynaecological cancer                                                                                                   | No use of SF-36/12                                                  |
| Unspecified<br>( <a href="http://www.who.int/trialssearch/Trial2.aspx?TrialID=ACTRN12614000168651">http://www.who.int/trialssearch/Trial2.aspx?TrialID=ACTRN12614000168651</a> ) | 2014 | ACTRN Clinical Trials Registry                    | Music Therapy for Older Adults                                                                                                                                                        | Not a music-focused intervention                                    |
| Unspecified<br>( <a href="http://www.who.int/trialssearch/Trial2.aspx?TrialID=DRKS00024549">http://www.who.int/trialssearch/Trial2.aspx?TrialID=DRKS00024549</a> )               | 2021 | DRKS (clinical trials registry)                   | Effects of Receptive Music Therapy with a Monochord in multiple sclerosis (MUTIMS) – a randomized controlled study                                                                    | Study ongoing                                                       |

|                                                                                                                                                                      |      |                                                |                                                                                                                                        |                                                           |
|----------------------------------------------------------------------------------------------------------------------------------------------------------------------|------|------------------------------------------------|----------------------------------------------------------------------------------------------------------------------------------------|-----------------------------------------------------------|
| Unspecified<br>( <a href="http://www.who.int/trialsearch/Trial2.aspx?TrialID=ISRCTN42943709">http://www.who.int/trialsearch/Trial2.aspx?TrialID=ISRCTN42943709</a> ) | 2019 | ISRCTN                                         | Singing and COPD: a pilot randomised controlled trial                                                                                  | Study ongoing                                             |
| Unspecified<br>( <a href="https://clinicaltrials.gov/show/NCT00500526">https://clinicaltrials.gov/show/NCT00500526</a> )                                             | 2007 | Clinicaltrials.gov                             | Effects of Singing in Chronic Obstructive Pulmonary Disease                                                                            | No use of SF-36, confirmed through author contact         |
| Unspecified<br>( <a href="https://clinicaltrials.gov/show/NCT03076801">https://clinicaltrials.gov/show/NCT03076801</a> )                                             | 2017 | Clinicaltrials.gov                             | Does Choral Singing Help Improve Stress in Patients With Ischemic Heart Disease?                                                       | No study results available                                |
| Unspecified<br>( <a href="https://clinicaltrials.gov/show/NCT04034212">https://clinicaltrials.gov/show/NCT04034212</a> )                                             | 2019 | Clinicaltrials.gov                             | Singing for Health: improving Experiences of Lung Disease (SHIELD Trial)                                                               | Study ongoing                                             |
| Unspecified<br>( <a href="https://clinicaltrials.gov/show/NCT04446624">https://clinicaltrials.gov/show/NCT04446624</a> )                                             | 2020 | Clinicaltrials.gov                             | Oxidative Stress, Anxiety and Depression in Breast Cancer Patients: impact of Music Therapy                                            | Not a music-focused intervention                          |
| Unspecified<br>( <a href="https://clinicaltrials.gov/show/NCT04638244">https://clinicaltrials.gov/show/NCT04638244</a> )                                             | 2020 | Clinicaltrials.gov                             | Brief Online Music Intervention (BOMI) in Improving the Mental Well-being of Young People in the Community in Hong Kong                | Study ongoing                                             |
| Vara et al.                                                                                                                                                          | 2020 | International Urogynecology Journal            | Music therapy in rehabilitation treatment for chronic pelvic pain                                                                      | No compatible SF-36 data available in conference abstract |
| Wahlstöm et al.                                                                                                                                                      | 2018 | Circulation                                    | Mediyoga improves health related quality of life and blood pressure among patients with paroxysmal atrial fibrillation-the MYPAF study | Abstract version of Wahlstrom et al. 2020 (included)      |
| Zanini et al.                                                                                                                                                        | 2010 | Journal of Hypertension                        | Music therapy contributing to the quality of life of hypertensive patients                                                             | Abstract version of Zanini et al. 2009 (included)         |
| Zheng & Zhang                                                                                                                                                        | 2020 | Basic and Clinical Pharmacology and Toxicology | Effect of Music on Novel Coronavirus Pneumonia Patients' Rehabilitation Training after Recovery                                        | No compatible SF-36 data available in conference abstract |

**eTable 2.** Review articles included at full-text article review stage. Citations of these reviews were searched for additional relevant articles.

| Author                         | Year | Journal                                 | Title                                                                                                                                                       |
|--------------------------------|------|-----------------------------------------|-------------------------------------------------------------------------------------------------------------------------------------------------------------|
| Archer, Buxton & Sheffield     | 2015 | Psycho-Oncology                         | The effect of creative psychological interventions on psychological outcomes for adult cancer patients: A systematic review of randomised controlled trials |
| Bradt & Dileo                  | 2014 | Cochrane Database of Systematic Reviews | Music interventions for mechanically ventilated patients                                                                                                    |
| Bradt et al.                   | 2016 | Cochrane Database of Systematic Reviews | Music interventions for improving psychological and physical outcomes in cancer patients                                                                    |
| Bradt, Dileo & Potvin          | 2013 | Cochrane Database of Systematic Reviews | Music for stress and anxiety reduction in coronary heart disease patients                                                                                   |
| Campbell, Bodkin-Allen & Swain | 2021 | Journal of Health Psychology            | Group singing improves both physical and psychological wellbeing in people with and without chronic health conditions: A narrative review                   |
| Geretsegger et al.             | 2014 | Cochrane Database of Systematic Reviews | Music therapy for people with autism spectrum disorder                                                                                                      |
| Geretsegger et al.             | 2017 | Cochrane Database of Systematic Reviews | Music therapy for people with schizophrenia and schizophrenia-like disorders                                                                                |
| Jespersen et al.               | 2015 | Cochrane Database of Systematic Reviews | Music for insomnia in adults                                                                                                                                |
| McNamara et al.                | 2017 | Cochrane Database of Systematic Reviews | Singing for adults with chronic obstructive pulmonary disease (COPD)                                                                                        |
| Sereda et al.                  | 2018 | Cochrane Database of Systematic Reviews | Sound therapy (using amplification devices and/or sound generators) for tinnitus                                                                            |
| Sinha et al.                   | 2011 | Cochrane Database of Systematic Reviews | Auditory integration training and other sound therapies for autism spectrum disorders (ASD)                                                                 |
| van der Steen et al.           | 2018 | Cochrane Database of Systematic Reviews | Music-based therapeutic interventions for people with dementia                                                                                              |
| Galaal et al.                  | 2011 | Cochrane Database of Systematic Reviews | Interventions for reducing anxiety in women undergoing colposcopy                                                                                           |
| Halsbeck et al.                | 2019 | Cochrane Database of Systematic Reviews | Musical and vocal interventions to improve neurodevelopmental outcomes for preterm infants                                                                  |
| Aalbers et al.                 | 2017 | Cochrane Database of Systematic Reviews | Music therapy for depression                                                                                                                                |
| Ghetti et al.                  | 2020 | Cochrane Database of Systematic Reviews | Music therapy for people with substance use disorders                                                                                                       |
| Irons et al.                   | 2019 | Cochrane Database of Systematic Reviews | Singing for people with Parkinson's disease                                                                                                                 |
| Irons, Kenny & Chang           | 2010 | Cochrane Database of Systematic Reviews | Singing for children and adults with bronchiectasis                                                                                                         |

|                            |      |                                                  |                                                                                                                          |
|----------------------------|------|--------------------------------------------------|--------------------------------------------------------------------------------------------------------------------------|
| Irons et al.               | 2019 | Cochrane Database of Systematic Reviews          | Singing as an adjunct therapy for children and adults with cystic fibrosis                                               |
| Leckey                     | 2011 | Journal of Psychiatric and Mental Health Nursing | The therapeutic effectiveness of creative activities on mental well-being: A systematic review of the literature         |
| Lee et a.                  | 2015 | Chest                                            | Distractive Auditory Stimuli in the Form of Music in Individuals With COPD A Systematic Review                           |
| Lin et al.                 | 2019 | Journal of Clinical Medicine                     | Music interventions for anxiety in pregnant women: A systematic review and meta-analysis of randomized controlled trials |
| Magee et al.               | 2017 | Cochrane Database of Systematic Reviews          | Music interventions for acquired brain injury                                                                            |
| Phillip, Lewis & Hopkinson | 2019 | Breathe                                          | Music and dance in chronic lung disease                                                                                  |

**eTable 3.** Details of GRADE ratings of included studies.

| GRADE Criteria                         |      |                    |                                                               |                                                        |                                    |                        |                      |                                 |                              |                        |
|----------------------------------------|------|--------------------|---------------------------------------------------------------|--------------------------------------------------------|------------------------------------|------------------------|----------------------|---------------------------------|------------------------------|------------------------|
| Author                                 | Year | Study Design       | Intention to treat analysis                                   | All outcome results reported                           | Blinding (assessors/data analysts) | Allocation concealment | % lost to follow-up* | Use of individual randomization | Controlled crossover effects | Overall quality rating |
| Altena et al. <sup>33</sup>            | 2009 | RCT                | Yes                                                           | Yes                                                    | Yes                                | Yes                    | None                 | Yes                             | N/A                          | High                   |
| Ashok, Shanmugam & Soman <sup>29</sup> | 2019 | RCT                | Yes                                                           | Yes                                                    | Unclear                            | Yes                    | Moderate (25%)       | Yes                             | N/A                          | Moderate               |
| Atiwannapat et al. <sup>37</sup>       | 2016 | RCT                | Yes                                                           | Yes                                                    | Yes                                | Unclear                | Moderate (20%)       | Yes                             | N/A                          | Moderate               |
| Bittman et al. <sup>43</sup>           | 2020 | RCT                | No (analysis only on those who attended at least 12 sessions) | Yes                                                    | No                                 | Unclear                | Unclear              | Yes                             | N/A                          | Low                    |
| Burrai et al. <sup>30</sup>            | 2020 | RCT                | Yes                                                           | Yes                                                    | Yes                                | Unclear                | Low (10%)            | Yes                             | N/A                          | Moderate               |
| Corvo, Skingley & Clift <sup>31</sup>  | 2020 | Single group study | Yes                                                           | Yes                                                    | No                                 | No                     | Low (9%)             | N/A                             | N/A                          | Low                    |
| Coulton et al. <sup>39</sup>           | 2015 | RCT                | Yes                                                           | Yes                                                    | Unclear                            | Yes                    | Moderate (20%)       | Yes                             | N/A                          | Moderate               |
| Davidson et al. <sup>23</sup>          | 2014 | Single group study | Yes                                                           | Yes                                                    | N/A                                | N/A                    | Moderate (19%)       | N/A                             | N/A                          | Very low               |
| Gale et al. <sup>40</sup>              | 2012 | Single group study | No (those who missed 4+ rehearsals excluded)                  | Yes                                                    | N/A                                | N/A                    | High (33%)           | N/A                             | N/A                          | Very low               |
| Groener et al. <sup>28</sup>           | 2015 | RCT                | Yes                                                           | Yes                                                    | Unclear                            | Unclear                | None                 | Yes                             | N/A                          | Moderate               |
| Hagemann, Martin & Neme <sup>24</sup>  | 2020 | Single group study | Yes                                                           | Yes                                                    | N/A                                | N/A                    | Moderate (26%)       | N/A                             | N/A                          | Very low               |
| Innes et al. <sup>44</sup>             | 2018 | RCT                | Yes                                                           | Yes                                                    | Yes                                | Yes                    | None                 | Yes                             | N/A                          | High                   |
| Innes et al. <sup>45</sup>             | 2016 | RCT                | Yes                                                           | Yes                                                    | Yes                                | Yes                    | None                 | Yes                             | N/A                          | High                   |
| Lavretsky et al. <sup>46</sup>         | 2013 | RCT                | Yes                                                           | No (only MCS and selected subscales of SF-36 reported) | Yes                                | Yes                    | Moderate (20%)       | Yes                             | N/A                          | Moderate               |
| Lee, Chan & Mok <sup>27</sup>          | 2010 | RCT                | Yes                                                           | Yes                                                    | No                                 | Yes                    | Low (11%)            | Yes                             | N/A                          | Moderate               |
| Logtenberg et al. <sup>34</sup>        | 2007 | RCT                | Yes                                                           | Yes                                                    | Yes                                | Yes                    | None                 | Yes                             | N/A                          | High                   |



|                               |      |                    |                                                              |     |         |         |                |                                         |     |          |
|-------------------------------|------|--------------------|--------------------------------------------------------------|-----|---------|---------|----------------|-----------------------------------------|-----|----------|
| Lord et al. <sup>45</sup>     | 2010 | RCT                | Yes                                                          | Yes | Yes     | Yes     | Moderate (19%) | No ( <i>block randomization</i> )       | N/A | Moderate |
| Lord et al. <sup>41</sup>     | 2012 | RCT                | Yes                                                          | Yes | Yes     | Yes     | Moderate (28%) | No ( <i>randomized in blocks of 4</i> ) | N/A | Moderate |
| Mandel et al. <sup>47</sup>   | 2007 | RCT                | Yes                                                          | Yes | Unclear | Unclear | High (36%)     | Yes                                     | N/A | Low      |
| Mateu et al. <sup>35</sup>    | 2018 | Single group study | Yes                                                          | Yes | Unclear | Unclear | None           | Yes                                     | Yes | Moderate |
| Mujdeci et al. <sup>38</sup>  | 2015 | Single group study | Yes                                                          | Yes | N/A     | N/A     | None           | N/A                                     | N/A | Low      |
| Philip et al. <sup>42</sup>   | 2020 | RCT                | Yes                                                          | Yes | Yes     | Yes     | None           | Yes                                     | N/A | High     |
| Ribeiro <sup>25</sup>         | 2018 | RCT                | No ( <i>analysis only of those with &gt;75% compliance</i> ) | Yes | Unclear | Unclear | High           | Yes                                     | N/A | Low      |
| Wahlstöm et al. <sup>36</sup> | 2020 | RCT                | Yes                                                          | Yes | Unclear | Yes     | High (34%)     | No ( <i>randomized in blocks of 6</i> ) | N/A | Low      |
| Zanini et al. <sup>26</sup>   | 2009 | RCT                | Yes                                                          | Yes | Unclear | Unclear | None           | Unclear                                 | N/A | Low      |
| Zeppegno et al. <sup>34</sup> | 2021 | RCT                | No ( <i>4 of 30 patients excluded for 'low compliance'</i> ) | Yes | Yes     | Yes     | None           | Yes                                     | N/A | Moderate |

eFigure 1. PRISMA flow diagram detailing the results of record screening and exclusion procedures.<sup>16</sup>

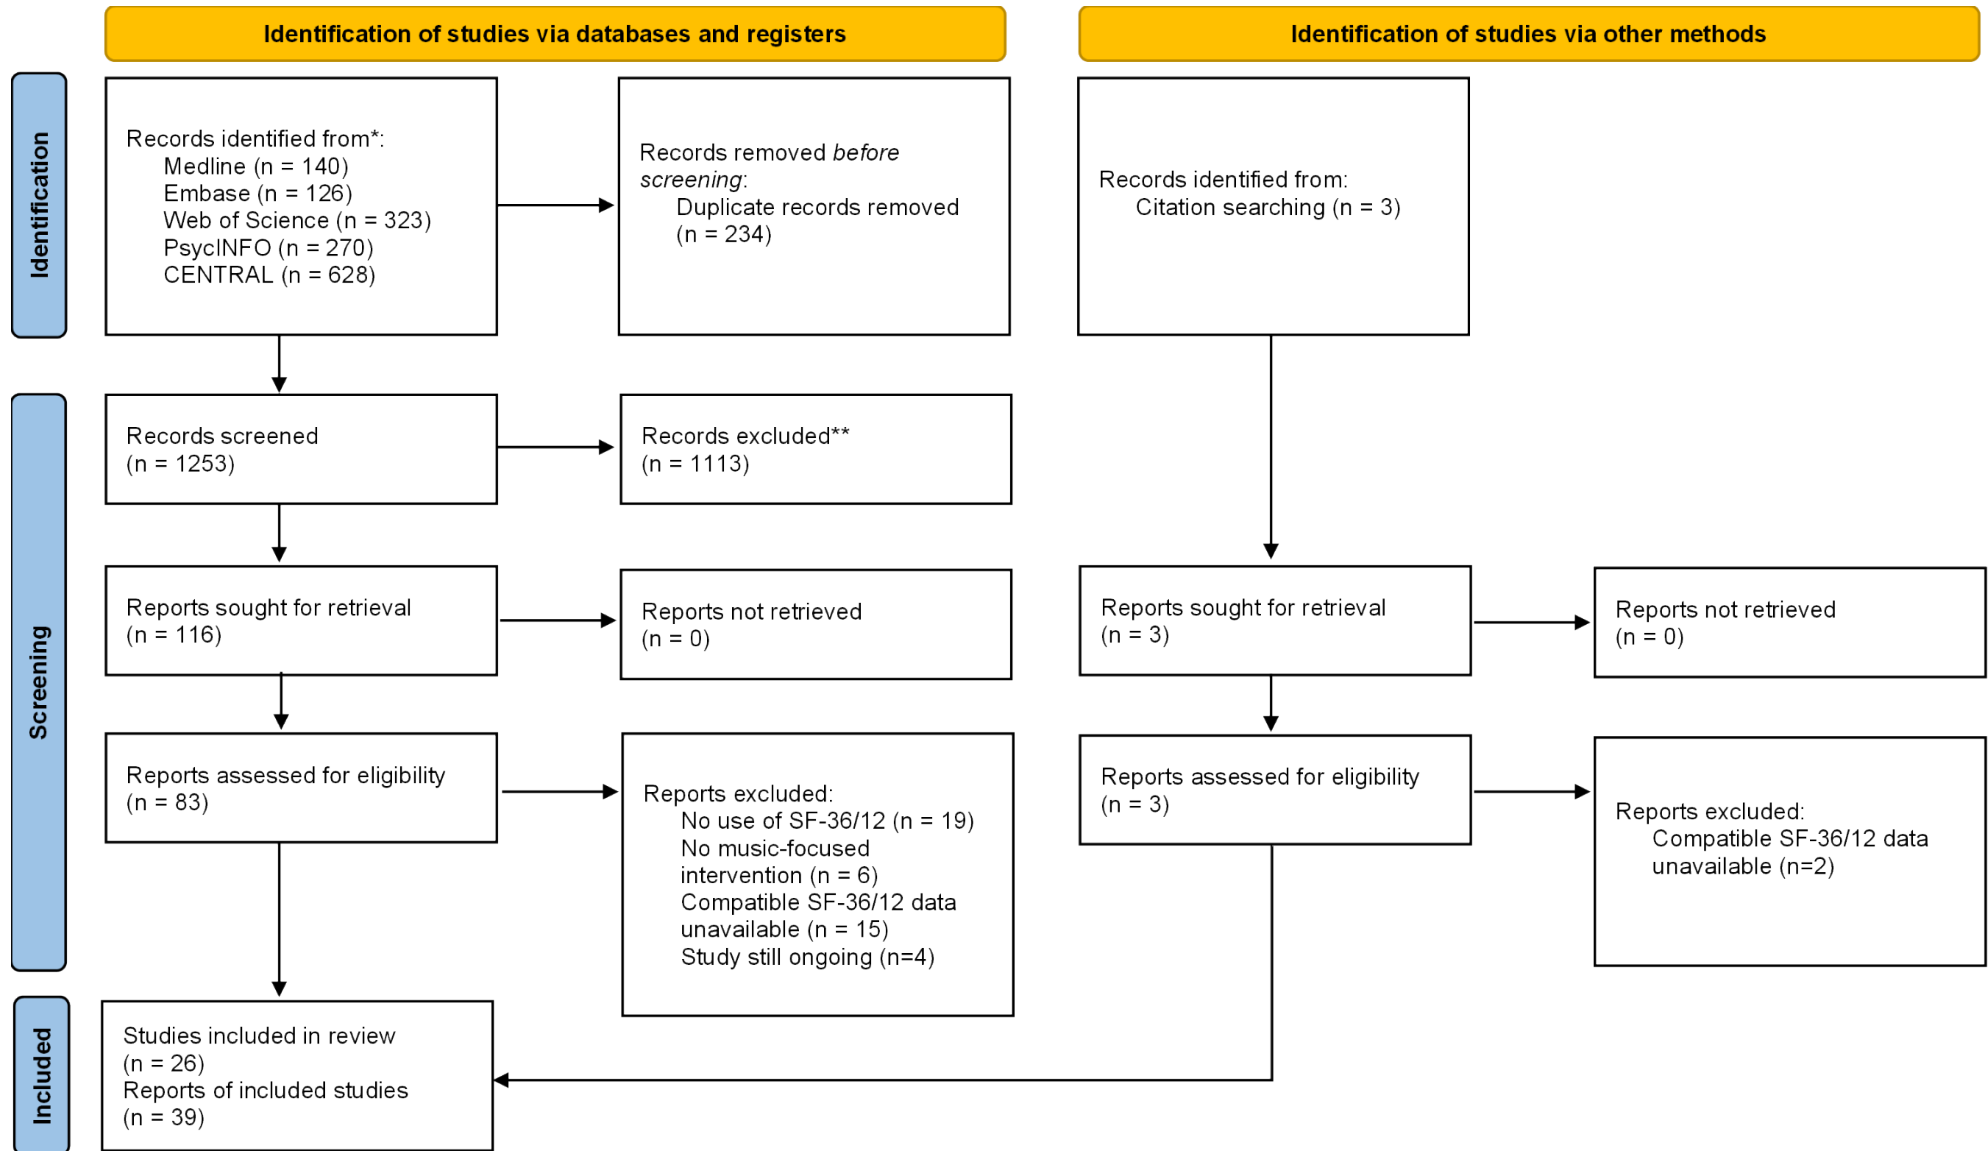

**eFigure 2.** Funnel plot detailing the distribution of pre-post intervention changes in MCS score, stratified by music intervention type. SE(MD) = Standard error of the mean difference. MD = Mean difference.

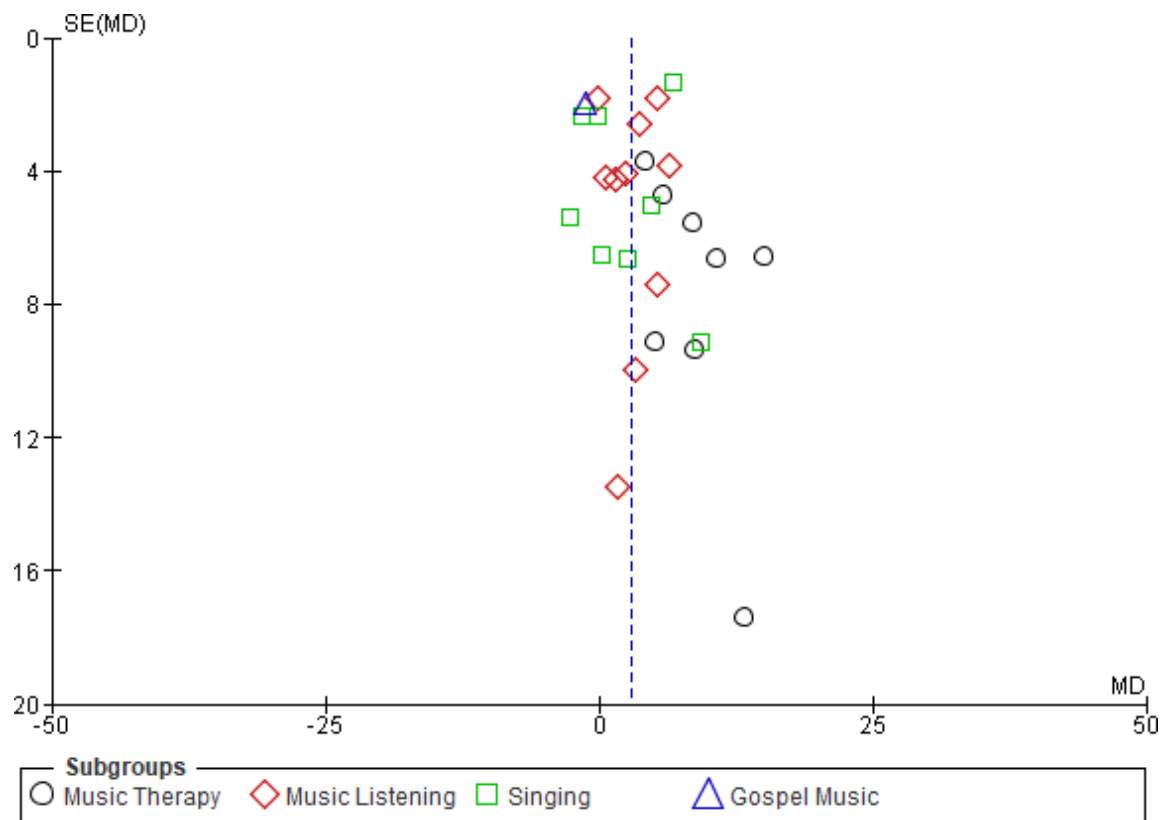

**eFigure 3.** Funnel plot detailing the distribution of pre-post intervention changes in PCS score, stratified by music intervention type. SE(MD) = Standard error of the mean difference. MD = Mean difference.

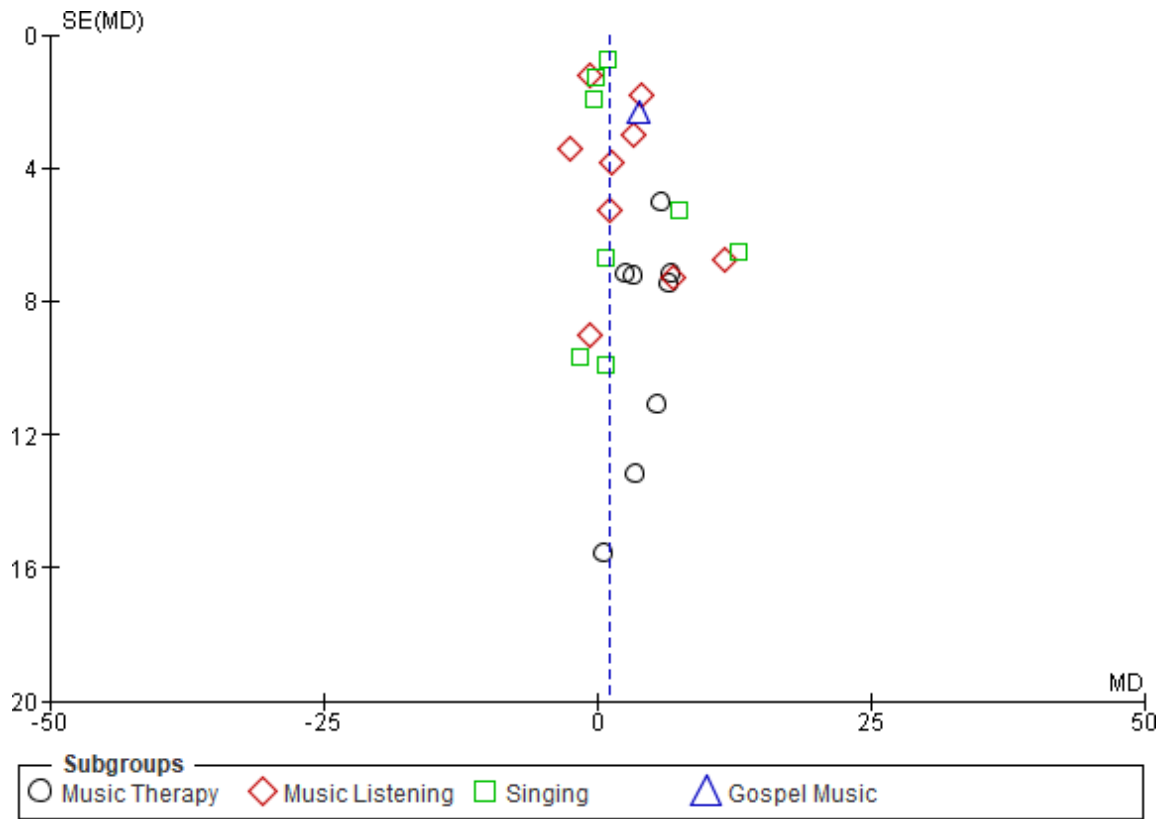

**eFigure 4.** Funnel plot detailing the distribution of changes in MCS scores in Music+TAU vs. TAU alone interventions, stratified by music intervention type. SE(MD) = Standard error of the mean difference. MD = Mean difference.

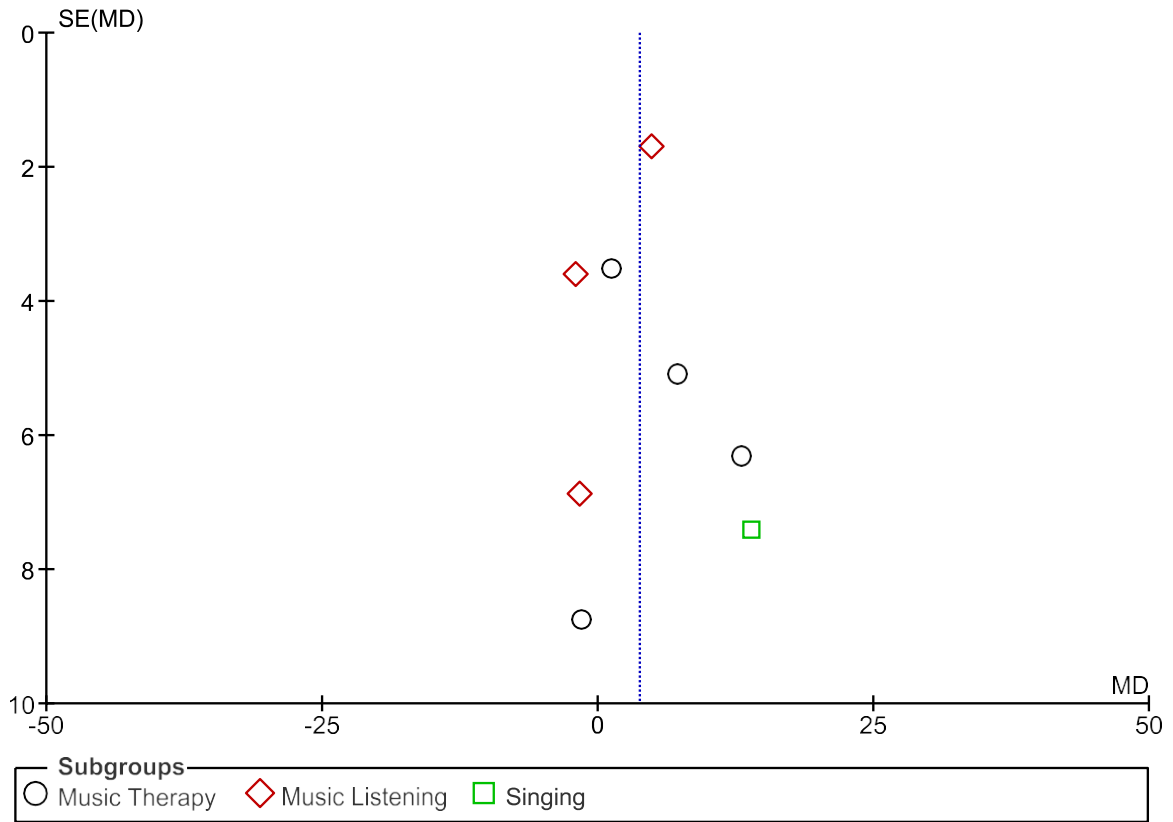

**eFigure 5.** Funnel plot detailing the distribution of changes in PCS scores in Music+TAU vs. TAU alone interventions, stratified by music intervention type. SE(MD) = Standard error of the mean difference. MD = Mean difference.

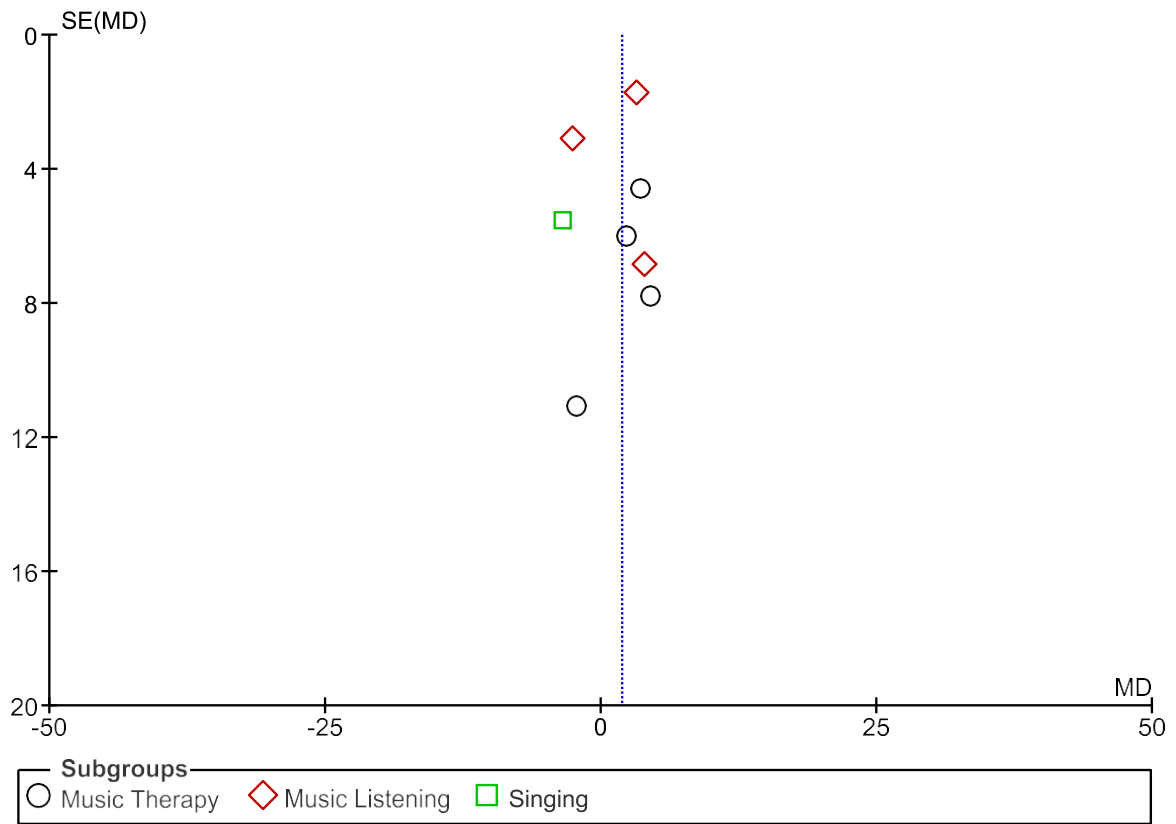

**eFigure 6.** Associations between music interventions and pre- to post-intervention changes in SF-36/SF-12 MCS scores, stratified by Music + TAU vs. all other music interventions. IV = ‘inverse variance’. ‘Total’ refers to the total number of participants included in analyses at pre- and post-intervention timepoints.

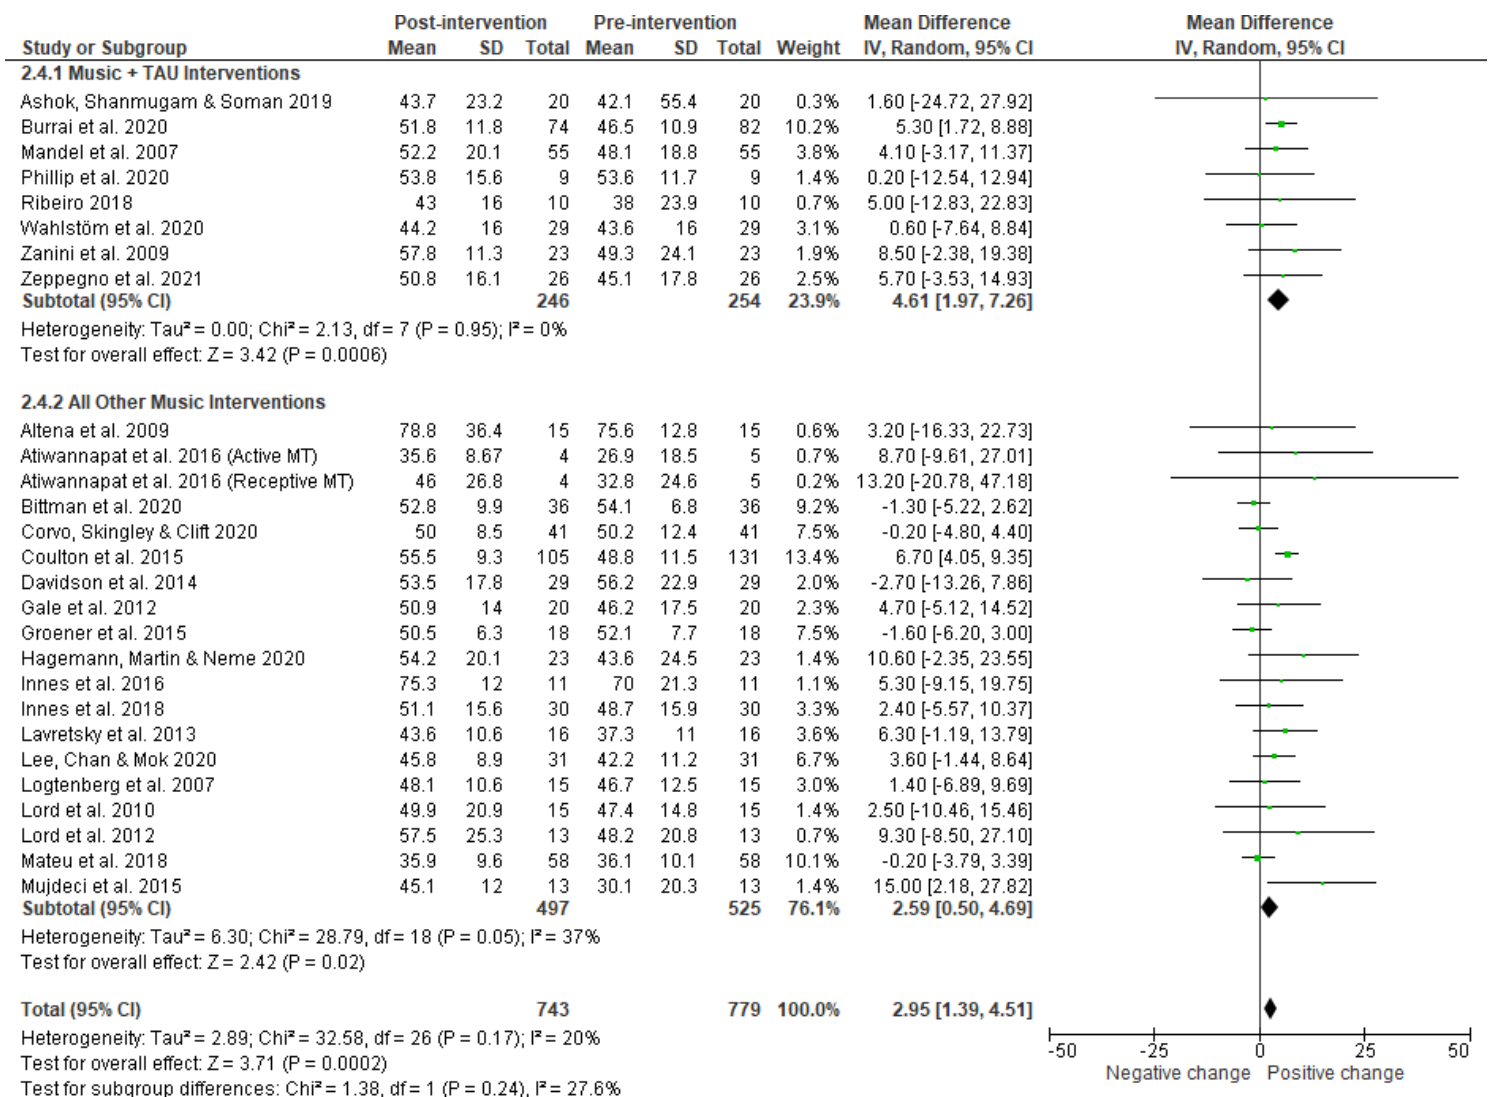

**eFigure 7.** Associations between music interventions and pre- to post-intervention changes in SF-36/SF-12 MCS scores, stratified by Music + TAU vs. all other music interventions. IV = ‘inverse variance’. ‘Total’ refers to the total number of participants included in analyses at pre- and post-intervention timepoints.

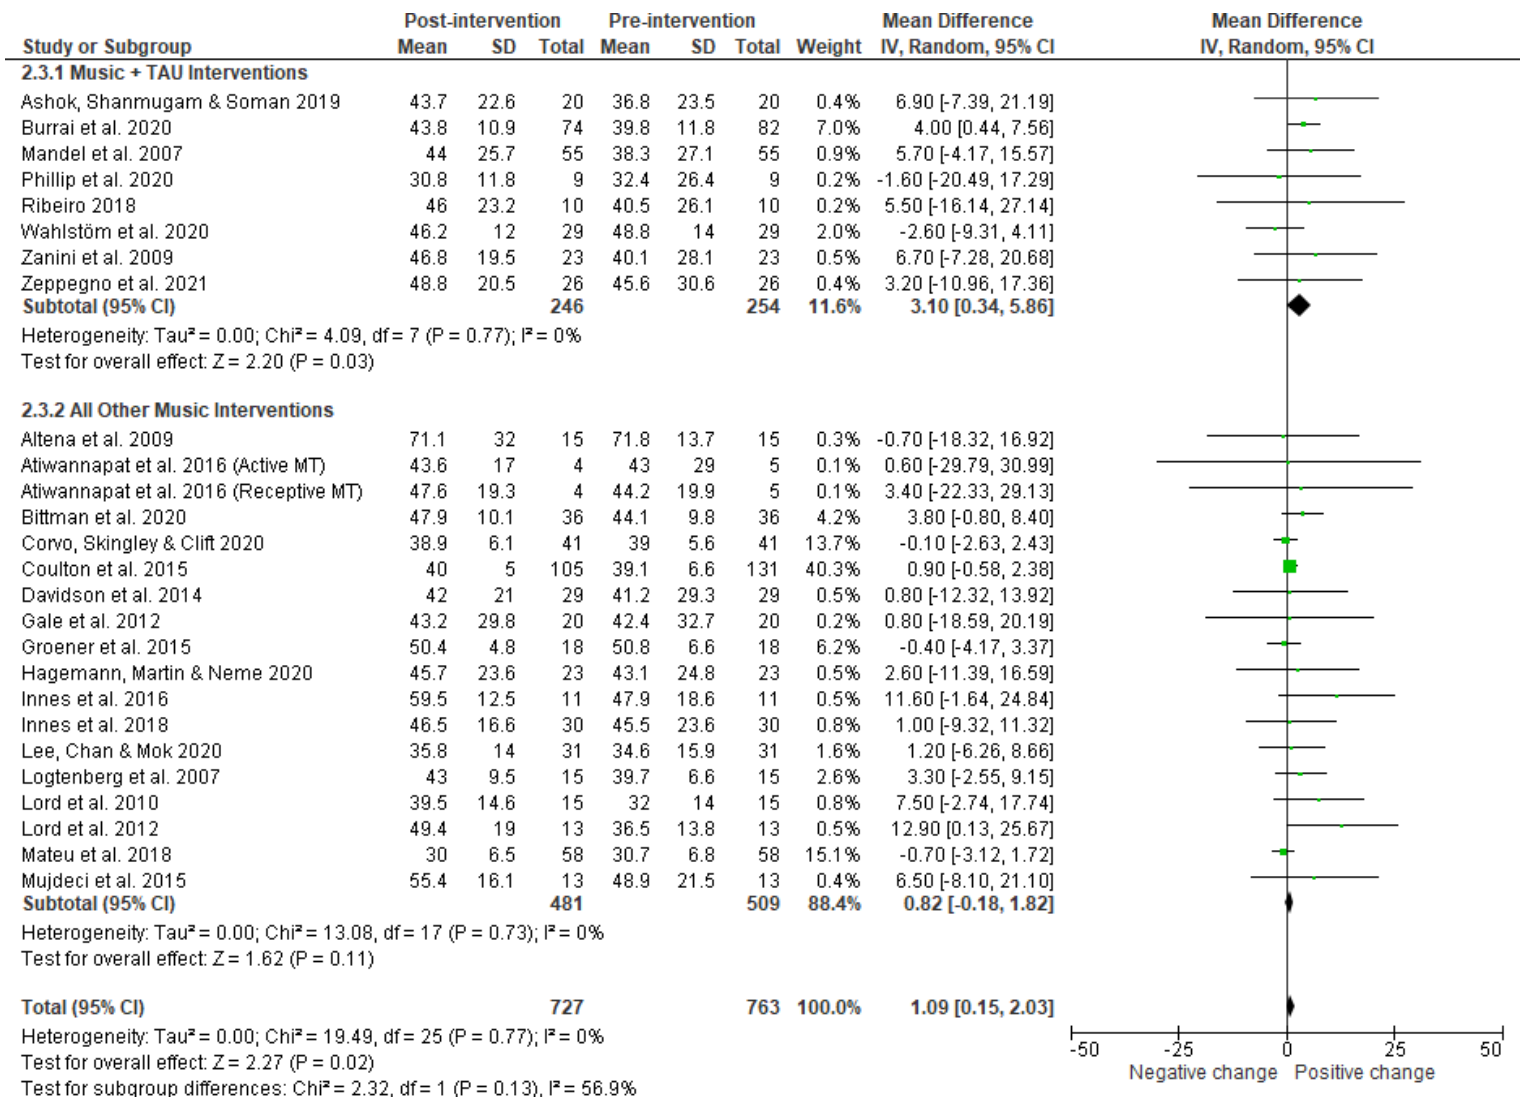



**eFigure 8.** Associations between music vs. meditation interventions and changes in SF-36/SF-12 MCS scores. IV = ‘inverse variance’. ‘Total’ refers to the total number of participants included in analyses at pre- and post-intervention timepoints.

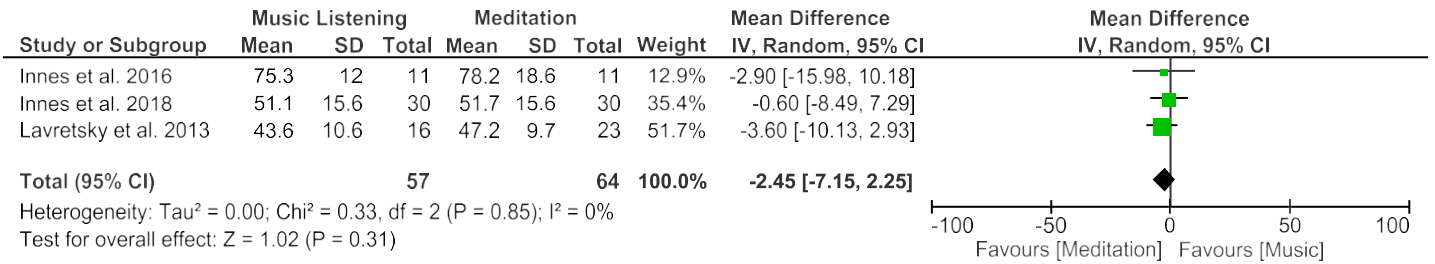

**eFigure 9.** Associations between music vs. meditation interventions and changes in SF-36/SF-12 PCS scores. IV = ‘inverse variance’. ‘Total’ refers to the total number of participants included in analyses at pre- and post-intervention timepoints. NB: Lavretsky et al. 2013 reported MCS scores only.

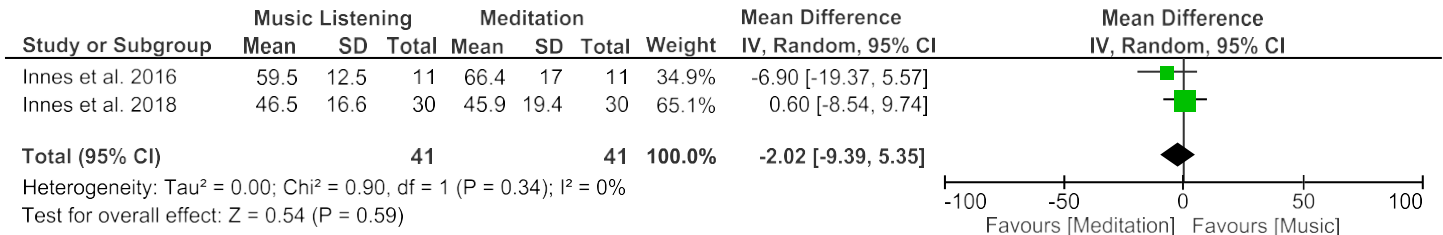

Supplement: jamanetwopen-e223236-s001.pdf [file jamanetwopen-e223236-s001.pdf]
